# Supplementary material for: Preclinical Data on Efficacy of 10 Drug-Radiation Combinations: Evaluations, Concerns, and Recommendations
Source: PubMed Central journal article supplement — Transl Oncol. 2016 Mar 3;9(1):46–56. doi: 10.1016/j.tranon.2016.01.002 (PMC4800059; doi:10.1016/j.tranon.2016.01.002), 2016-03-03
Supplement: mmc1.pdf [file mmc1.pdf]

**Supplement****Supplementary Table 1. Drug Names, Synonyms, and Properties**

| <b>Drug names</b> | <b>Synonyms</b>                                               | <b>Properties</b>                                                                                                                                                                           |
|-------------------|---------------------------------------------------------------|---------------------------------------------------------------------------------------------------------------------------------------------------------------------------------------------|
| AZD6244           | Selumetinib,<br>ARRY-142886                                   | Inhibitor of MEK or MAPK/ERK kinases 1 and 2<br>Inhibition of cell proliferation                                                                                                            |
| Bortezomib        | PS-341,<br>Velcade,<br>LDP 341,<br>MLN341                     | Inhibition of the 26S proteasome<br>Disruption of signaling pathways, induction of cell cycle arrest, apoptosis, and inhibition of angiogenesis                                             |
| DMAG              | 17-DMAG<br>HCL,<br>alvespimycin<br>hydrochloride,<br>KOS-1022 | Inhibition of HSP90 Chaperone protein<br>Destabilization and degradation of oncogenes, kinases, transcription factors and other client proteins involved in cell proliferation and survival |
| Erlotinib         | Tarceva,<br>CP-358,744,<br>OSI-744                            | ATP-competitive inhibition of EGFR signal transduction                                                                                                                                      |
| Gefitinib         | Iressa, ZD 1839                                               | ATP-competitive inhibition of tyrosine kinases, including EGFR<br>Inhibition of EGFR signal transduction                                                                                    |
| Lapatinib         | Tykerb,<br>GSK572016,<br>GW2016,<br>GW-572016                 | Blocks phosphorylation of EGFR, ErbB2, and Erk-1 and -2 and AKT kinases                                                                                                                     |

Preclinical efficacy of 10 drug-radiation combinations, Supplement

|                       |                                                                                                                                                                                              |                                                                                                                                                 |
|-----------------------|----------------------------------------------------------------------------------------------------------------------------------------------------------------------------------------------|-------------------------------------------------------------------------------------------------------------------------------------------------|
| Oxaliplatin           | --                                                                                                                                                                                           | Forms inter- and intra-strand platinum-DNA crosslinks<br>Inhibition of DNA replication and transcription<br>Cell-cycle independent cytotoxicity |
| Lipoxal <sup>TM</sup> | Oxaliplatin-<br>encapsulated<br>Tf-conjugated<br>NGPE<br>liposome                                                                                                                            | Liposomal formulation of oxaliplatin (see above)                                                                                                |
| Sunitinib             | Sutent,<br>SU11248,<br>SU011248                                                                                                                                                              | Tyrosine kinase inhibitor of VEGFR2, PDGFR $\beta$ , FLT3<br>and c-kit<br>Inhibition of angiogenesis and cell proliferation                     |
| Thalidomide           | Alpha-<br>phthalimidogluta<br>arimide, N-<br>phthaloylgluta<br>mimide, N-<br>phthalylglutami<br>c acid imide,<br>Synovir,<br>Thalomid,<br>Contergan,<br>Distaval,<br>Kevadon,<br>Neurosedyn, | A synthetic derivative of glutamic acid active through<br>immunomodulatory, anti-inflammatory and anti-<br>angiogenic properties                |

Preclinical efficacy of 10 drug-radiation combinations, Supplement

|  |                                                      |  |
|--|------------------------------------------------------|--|
|  | Pantosediv,<br>Sedoval K-17,<br>Softenon,<br>Talimol |  |
|--|------------------------------------------------------|--|

**Supplementary Table 2. Papers Surveyed (N=125)**

| <b>Drug</b>                        | <b>References;<br/>see below</b> |
|------------------------------------|----------------------------------|
| AZD6244                            | [1-4]                            |
| Bortezomib                         | [5-17]                           |
| 17-DMAG                            | [18-21]                          |
| Erlotinib                          | [22-34]                          |
| Gefitinib                          | [35-70]                          |
| Lapatinib                          | [71-76]                          |
| Oxaliplatin/ Lipoxal <sup>TM</sup> | [77-93]                          |
| Sunitinib                          | [94-103]                         |
| Thalidomide                        | [104-107]                        |
| Vorinostat                         | [108-125]                        |

**Supplementary Table 3. *In vitro* schedules.** Note: some papers used more than one schedule; some schedules were used in more than one paper. D=drug, R=radiation. The time of drug removal or replating is indicated if reported by the authors.

| <b>Drug</b> | <b>Schedule; D=Drug, R=radiation, min=minutes, h=hours, d=days</b> | <b>References; see below</b> |
|-------------|--------------------------------------------------------------------|------------------------------|
| AZD6244     | D-immediate-R-48h-D removed (replated)                             | [3]                          |
|             | D-2h-R                                                             | [4]                          |
|             | D-16h-R                                                            | [1, 2]                       |
|             | D-48h-R                                                            | [3]                          |
| Bortezomib  | D24h-R simultaneous (exact timing not given)                       | [9, 13]                      |
|             | D-1h-R                                                             | [16]                         |
|             | D-4h-R                                                             | [12, 14]                     |
|             | D-16h-R                                                            | [8]                          |
|             | D-16h-washed out-R                                                 | [6]                          |
|             | D-24-R                                                             | [5, 10]                      |
|             | D-24h-R-replated                                                   | [13]                         |
|             | R-24h-D-24h-replated                                               | [13]                         |
|             | R-24h-D-48h                                                        | [7]                          |
|             | R-48h-D-(duration not reported)                                    | [9]                          |
|             | (D duration, D+R schedule not reported)                            | [15]                         |
| DMAG        | D-R simultaneous (D duration, exact timing not given)              | [21]                         |
|             | D-6h-R                                                             | [19]                         |
|             | D-8h-R                                                             | [19, 21]                     |
|             | D-16h-R                                                            | [18, 21]                     |

Preclinical efficacy of 10 drug-radiation combinations, Supplement

|           |                                                                                  |              |
|-----------|----------------------------------------------------------------------------------|--------------|
|           | D-16h-R-washout                                                                  | [20]         |
| Erlotinib | D-1h-R; D on for duration of experiment                                          | [30, 31]     |
|           | D-1h-R (D duration unclear)                                                      | [32]         |
|           | D-1h-R-3h-washout                                                                | [22]         |
|           | D-2h-R                                                                           | [25, 27, 29] |
|           | D-R (D duration, D+R schedule not reported)                                      | [34]         |
|           | DR simultaneous (D duration, exact timing not given)                             | [34]         |
|           | D-overnight-R (D duration not clear)                                             | [34]         |
|           | D-24h-replated, allowed to adhere-R                                              | [22]         |
|           | D-24h-R; D on for duration of experiment                                         | [30]         |
|           | D-72-R                                                                           | [23, 26]     |
|           | D-72h-washout-24h-R                                                              | [26]         |
|           | R-D-72h-washout                                                                  | [26]         |
|           | R-D (D duration, D+R schedule not reported)                                      | [34]         |
| Gefitinib | D-R simultaneous (D duration, D+R schedule not reported)                         | [69, 70]     |
|           | D-5min-R                                                                         | [64]         |
|           | D $\leq$ 30min-R-24h-washout                                                     | [61]         |
|           | D-30min-R-4h-washout                                                             | [64]         |
|           | D-30min-R-6h-washout                                                             | [64]         |
|           | D-30min-R-8h-washout                                                             | [64]         |
|           | D-30min-R-24h-washout                                                            | [64]         |
|           | D-30min-R-6d-washout                                                             | [35]         |
|           | D-30min-R-24h-R-24h-R; fresh D before final R and every 48h during 5d incubation | [67]         |

Preclinical efficacy of 10 drug-radiation combinations, Supplement

|  |                                                        |                                 |
|--|--------------------------------------------------------|---------------------------------|
|  | D-1h-R                                                 | [65]                            |
|  | D-1h-R-24h-washout                                     | [54]                            |
|  | D-2h-R                                                 | [42, 59]                        |
|  | D-3h-R-6h-washout                                      | [45]                            |
|  | D-4h-R-68h washout                                     | [56]                            |
|  | D-12h-R-6h-replated                                    | [48]                            |
|  | D-12h-washed-12h-R                                     | [69]                            |
|  | D-16h-R-replated                                       | [39]                            |
|  | D-18h-R                                                | [49]                            |
|  | D-24h-R                                                | [36, 44, 51, 52, 63,<br>66, 68] |
|  | D-24h-R-washout                                        | [35, 53, 57]                    |
|  | D-24h-R-24h-washout                                    | [40]                            |
|  | D-24h-R-7d-fresh D                                     | [37]                            |
|  | D-48h-R-washout                                        | [53]                            |
|  | D-48h-R                                                | [43, 61]                        |
|  | D-48h-R-24h-R-24h-R (duration of D exposure not given) | [55]                            |
|  | D-72h-R                                                | [52]                            |
|  | D-72h-R-replated                                       | [47]                            |
|  | D-144h-R                                               | [52]                            |
|  | R-D-2h                                                 | [35]                            |
|  | R-D-4h                                                 | [35]                            |
|  | R-D-8h                                                 | [35]                            |
|  | R-D-12h                                                | [35]                            |

Preclinical efficacy of 10 drug-radiation combinations, Supplement

|             |                                                        |          |
|-------------|--------------------------------------------------------|----------|
|             | R-D-24h                                                | [35]     |
|             | R-D-24h-washout                                        | [38, 53] |
|             | R-replated-D-96h                                       | [37]     |
|             | R-replated-D-288h (12d)                                | [63]     |
|             | R-24h-D-12h                                            | [69]     |
|             | R-24h-D-48h                                            | [50]     |
| Lapatinib   | D-1h-R-10min-washout                                   | [76]     |
|             | D-2h-R-2h-washout                                      | [72, 74] |
|             | D-24h-R-replated                                       | [73]     |
| Oxaliplatin | D-1h-R-24h-washout                                     | [77, 79] |
|             | D-2h-R                                                 | [85, 90] |
|             | D-2h-washout-R                                         | [87, 93] |
|             | D-2h-washout-12h-R                                     | [88]     |
|             | D-2h-washout-24h-R                                     | [87, 88] |
|             | D-2h-R; medium changed at time of exposure and at 48h  | [85]     |
|             | D-3h-R                                                 | [89]     |
|             | D-3h-washout-48h-R                                     | [89]     |
|             | D-4h-washout-R                                         | [80]     |
|             | D-8h-R                                                 | [91]     |
|             | D-24h-R                                                | [90]     |
|             | D-24h-R-washout                                        | [86]     |
|             | D-24h-removed all but 1mm medium over cells-R-replated | [84]     |
|             | D-48h-R                                                | [91]     |
|             | R-D-2h                                                 | [85]     |



Preclinical efficacy of 10 drug-radiation combinations, Supplement

|             |                                                    |           |
|-------------|----------------------------------------------------|-----------|
|             | R-2h-D-2h                                          | [85, 88]  |
|             | R-24h-D-2h                                         | [85]      |
| Sunitinib   | D-1h-R-washout                                     | [97]      |
|             | D-1h-washout-R-washed-replated                     | [99]      |
|             | D-24h-R                                            | [103]     |
|             | D-24h-R-replated                                   | [94, 100] |
|             | [schedule not given]                               | [102]     |
| Thalidomide | D-30min-R-washout                                  | [107]     |
|             | D-1h-R, D in medium after R, duration not given    | [105]     |
|             | D-1h-R                                             | [104]     |
|             | D-R-D, exact timing and total D duration not clear | [105]     |
|             | R-D1h                                              | [105]     |
| Vorinostat  | D-2h-R                                             | [122]     |
|             | D-2h-R-D throughout incubation                     | [110]     |
|             | D-3h-R                                             | [117]     |
|             | D-4h-R                                             | [124]     |
|             | D-6h-R-(66h-washout?)                              | [116]     |
|             | D-16h-R-3h-replated                                | [111]     |
|             | D-16h-R-D throughout incubation                    | [108]     |
|             | D-18h-R                                            | [121]     |
|             | D-18h-R-washout                                    | [114]     |
|             | D-18h-washout-R                                    | [115]     |
|             | D-18h-washout-3h-R                                 | [115]     |
|             | D-18h-washout-6h-R                                 | [115]     |

Preclinical efficacy of 10 drug-radiation combinations, Supplement

|  |                          |       |
|--|--------------------------|-------|
|  | D-24h-R                  | [119] |
|  | D-24h-washout-R          | [123] |
|  | D-24h-R-washout          | [118] |
|  | D-24h-R-(10-12d)-washout | [109] |
|  | D-48h-R                  | [113] |
|  | D-48h-washout-30min-R    | [120] |
|  | D-48h-washout-24h-R      | [120] |
|  | [schedule not clear]     | [112] |

**Supplementary Table 4. Radiation sources**

| <b>Radiation source</b>                                         | <b><i>In vitro</i>, of 104 papers</b> | <b><i>In vivo</i>, of 51 papers</b> |
|-----------------------------------------------------------------|---------------------------------------|-------------------------------------|
| X rays                                                          | 28*                                   | 17                                  |
| <sup>137</sup> Cs                                               | 24*, *                                | 6*                                  |
| <sup>60</sup> Co                                                | 16*                                   | 2                                   |
| Linear accelerator, photons (X rays)                            | 5                                     | 4*                                  |
| Linear accelerator, electrons                                   | 1                                     | 5                                   |
| Linear accelerator, beam type not given                         | 4                                     | 1                                   |
| Neutrons                                                        | 2                                     | 0                                   |
| Heavy ions, not identified                                      | 1                                     | 0                                   |
| Manufacturer name and/or model reported, but not radiation type | 10                                    | 9                                   |
| Not reported or unclear                                         | 15                                    | 8                                   |

\*Papers using 2 different radiation sources were counted twice

Supplementary Table 5. *In vivo* schedules

| Single fraction irradiation |                                                                                          |                                                   |                                            |                              |
|-----------------------------|------------------------------------------------------------------------------------------|---------------------------------------------------|--------------------------------------------|------------------------------|
| Drug                        | Schedule<br><br>D=Drug, R=radiation;<br><br>min=minutes, h=hours, d=days,<br><br>w=weeks | R dose/fraction x # of<br><br>fractions=Total, Gy | D dose/fraction x # doses; d=days, w=weeks | References;<br><br>see below |
| AZD6244                     | D-4h-R                                                                                   | 3 x 1 = 3                                         | 50 mg/kg x 1                               | [1]                          |
| Bortezomib                  | D-4h-R                                                                                   | 6 x 1 = 6                                         | 1 mg/kg x 1                                | [14]                         |
|                             | R-5h-D + D 2x/w, duration not<br>given                                                   | 10 x 1 = 10                                       | 1.3mg/m <sup>2</sup> x 2/w x ?w            | [17]                         |
| DMAG                        | D-12h-D-12h-R                                                                            | 5 x 1 = 5                                         | 50mg/kg x 1                                | [19]                         |
| Erlotinib                   | D in feed for 4d-R                                                                       | 6 x 1 = 5                                         | 50mg/kg/d, duration not given              | [22]                         |
|                             | D daily x 15d, R x 1, timing not<br>given                                                | 8 x 1 = 8                                         | 1.6mg/d x 15d                              | [33]                         |
| Gefitinib                   | (D+R) + 9 more daily D in 2w; exact<br>timing, schedule not given                        | 5 x 1                                             | 50mg/kg/d x 5d/w x 2w                      | [42]                         |
|                             | D-1d-R + 4 more daily D-2d off-+5<br>more daily D; exact timing not given                | 10 x 1                                            | 75mg/kg x 5d/w x 2w                        | [63]                         |

Preclinical efficacy of 10 drug-radiation combinations, Supplement

|                       |                                     |                               |                                          |          |
|-----------------------|-------------------------------------|-------------------------------|------------------------------------------|----------|
|                       | R-2h-D + 4 more daily D             | 5 x 1                         | 100mg/kg/d x 5d                          | [46]     |
|                       | D-2h-R + 13 more daily D            | 5 x 1                         | 50mg/kg/d x 14d                          | [67]     |
|                       | D-2h-R + 2 more daily D             | 10 x 1                        | 50mg/kg x 3d                             | [38]     |
| Lapatinib             | [none]                              | --                            | --                                       | --       |
| Oxaliplatin           | D-1h-R                              | 10 x 1 = 10 or 20 x 1 =<br>20 | 6 or 10mg/kg x 1                         | [83]     |
|                       | D-2h-R                              | 4 x 1 = 4 (neutrons)          | 10mg/kg x 1                              | [78]     |
|                       | D-4h-R                              | 10 x 1 = 10                   | 6 or 10mg/kg x 1                         | [83]     |
|                       | D-4h-R                              | 15 x 1 = 15                   | 10mg/kg x 1                              | [92]     |
|                       | D- 24h-R                            | 10 x 1 = 10                   | 6 or 10mg/kg x 1                         | [83]     |
|                       | D-24-R                              | 15 x 1 = 15                   | 10mg/kg x 1                              | [92]     |
|                       | D-48h-R                             | 15 x 1 = 15                   | 10mg/kg x 1                              | [92]     |
|                       | R-1h-D                              | 10 x 1 = 10                   | 6 or 10mg/kg x 1                         | [83]     |
|                       | R-4h-D                              | 10 x 1 = 10                   | 6 or 10mg/kg x 1                         | [83]     |
|                       | R- 24h-D                            | 10 x 1 = 10                   | 6 or 10mg/kg x 1                         | [83]     |
| Lipoxal <sup>TM</sup> | D-24h-R                             | 15 x 1 = 15                   | Equivalent to 3mg/rat of oxaliplatin x 1 | [81, 82] |
| Sunitinib             | (D-1d-R-1d) x 3, then 14 more daily | 8 x 1 = 8                     | 20mg/kg/d x 17d                          | [100]    |

Preclinical efficacy of 10 drug-radiation combinations, Supplement

|             |                                                                 |                                        |                    |       |
|-------------|-----------------------------------------------------------------|----------------------------------------|--------------------|-------|
|             | D                                                               |                                        |                    |       |
|             | D + R, exact timing not given, + 8<br>more daily D              | 15 x 1 = 15                            | 40mg/kg/d x 9d     | [103] |
|             | D + R, exact timing not given, + 6<br>more daily D, weekend off | 8 x 1 = 8                              | 40mg/kg/d x 7/1.5w | [96]  |
|             | D daily x 14d-1d?-R                                             | 2, 4, 8, or 16                         | 30mg/kg/d x 14d    | [99]  |
| Thalidomide | D daily x 3d, R on 3rd d, exact<br>timing of D & R not given    | 20 (tumor periphery) or<br>18 (center) | 4mg/rat x 3d       | [106] |
|             | D just before R                                                 | 20 x 1 = 20                            | 200mg/kg x 1       | [104] |
|             | (D daily x 2d)-R; exact timing D &<br>R not given               | 20 x 1 = 20                            | 200mg/kg/d x 2d    | [104] |
|             | (D i.p. x 1/d x 4d)-R exact timing D<br>& R not given           | 20 x 1 = 20                            | 200mg/kg/d x 4d    | [104] |
|             | R-(D daily x 2d) exact timing D & R<br>not given                | 20 x 1 = 20                            | 200mg/kg/d x 2d    | [104] |
| Vorinostat  | D-6h-R                                                          | 3 x 1 = 3                              | 50mg/kg            | [108] |
|             | D-6h-R                                                          | 5 x 1 = 5                              | 75mg/kg x 1        | [108] |

Preclinical efficacy of 10 drug-radiation combinations, Supplement

|                                                |                                                                       |             |                                         |       |
|------------------------------------------------|-----------------------------------------------------------------------|-------------|-----------------------------------------|-------|
|                                                | D-24h-(R+D; exact timing not given) + 6 more daily D                  | 10 x 1 = 10 | 100mg/kg/d x 8 (5/w x 1.5w)             | [125] |
|                                                | R-immediate-D                                                         | 4 x 1 = 4   | 25mg/kg x 3/w x 3w                      | [112] |
| <b>Multifraction irradiation; fx=fractions</b> |                                                                       |             |                                         |       |
| AZD6244                                        | (D-2h-R-6h-D) x 5d - (D-8h-D) for 5 more days                         | 2x5=10      | 25mg/kg x 2/d x 10d                     | [3]   |
|                                                | (D-8h-D) x 5d - (D-2h-R-6h-D) for 5 more days                         | 2x5=10      | 25mg/kg x 2/d x 10d                     | [3]   |
| Bortezomib                                     | (R+D) x 3/w x 2w; exact timing of R & D not given                     | 1.5x6=9     | 0.1mg/kg x 3/w x 2w                     | [15]  |
|                                                | (D-4h-R) x 1/w x 2w                                                   | 10x2=20     | 0.9 mg/kg x 1/w x 2w                    | [11]  |
|                                                | R x 5fx/w x 2w; (D-4h-R on d 1, 4, 8, 11)                             | 2x10=20     | 0.45mg/kg x 2/w x 1.5w                  | [11]  |
|                                                | R x 4d; D 2x/w for duration of study; exact timing of D & R not given | 5x4=20      | 0.5mg/kg/d x 2d/w for duration of study | [9]   |
| DMAG                                           | [none]                                                                | --          | --                                      | --    |

Preclinical efficacy of 10 drug-radiation combinations, Supplement

|           |                                                                              |                                             |                                         |      |
|-----------|------------------------------------------------------------------------------|---------------------------------------------|-----------------------------------------|------|
| Erlotinib | R x 5/w x 2w; D-4h-R on d1-5 & 8-12; exact timing of D & R not given         | 1x10=10                                     | 100 mg/kg/d x 2/w x 2w                  | [26] |
|           | R x 3/w x 2w; D 5x/w x 2w; exact timing of D & R not given                   | 2x6=12                                      | 100 mg/kg/d x 5/w x 2w                  | [28] |
|           | R x 2/w x 3w; D 1x/d during course of R; exact timing of D & R not given     | 2x6=12                                      | 0.8mg/mouse/d x 3w                      | [23] |
|           | R x 2/d x 5d; D daily M-F until death; exact timing of D & R not given       | 2x10=20                                     | 150 mg/kg/d x 5/w for duration of study | [28] |
|           | R on d4, 7, 9, 11, D 1x/d x 10d starting d1; exact timing of D & R not given | (2, 4, 6, 8, or 10)x4=8, 16, 24, 32, or 40  | 100 mg/kg/d x 10d                       | [32] |
|           | R x 5/w x 6w; D 1x/d on d0-42; exact timing of D & R not given               | (range of doses)x30=<br>(~25-150 for TCD50) | 50 mg/kg/d x 43d                        | [24] |
| Gefitinib | (D-2h-R) x 5d                                                                | 1x5=5                                       | 100 mg/kg/d x 5d                        | [46] |
|           | R x 4d; D 5x/w x 2w, starting 1d                                             | 2.5x4=10                                    | 75 mg/kg/d x 5/w x 2w                   | [63] |



Preclinical efficacy of 10 drug-radiation combinations, Supplement

|  |                                                                                           |                                   |                                          |      |
|--|-------------------------------------------------------------------------------------------|-----------------------------------|------------------------------------------|------|
|  | before first R; exact timing of D & R<br>not given                                        |                                   |                                          |      |
|  | R x 2/w x 2w; D daily x 5d/w x 2w;<br>exact timing of D & R not given                     | 4x4=16                            | 100mg/kg/d x 5d/w x 2w                   | [58] |
|  | R x 2/w, total 7 fractions; D 1 x/d x<br>12; exact schedule, timing of D & R<br>not given | 3x7=21                            | 0.5mg/mouse/d x 5/w x 2.5w               | [47] |
|  | [(R+D)-1d-D 4d/w] x 3w; exact<br>timing of D & R not given                                | 8x3=24                            | 100 mg/kg/d x 5/w x 3w                   | [62] |
|  | (R+D) x 5d/w x 2w; exact timing of<br>D & R not given                                     | (1, 2, or 4) x10=10, 20,<br>or 40 | 150 mg/kg/d x 5/w x 2w                   | [60] |
|  | R x 4d; D 1 x/d x 5d/w x 4w; exact<br>schedule, timing of D & R not given                 | 10x4=40                           | 100 mg/kg/d x 5/w x 4w                   | [37] |
|  | R x 5/w x 3w; D every other day<br>throughout; exact timing of D & R<br>not given         | 4x15=60                           | 100 mg/kg/d every other day for duration | [41] |
|  | (D-2h-R)/d x 3d + 11 more daily D                                                         | 2x3=6                             | 100mg/kg/d x 14d                         | [67] |

Preclinical efficacy of 10 drug-radiation combinations, Supplement

|             |                                                                         |          |                                       |       |
|-------------|-------------------------------------------------------------------------|----------|---------------------------------------|-------|
| Lapatinib   | (D-6h-D) x 6d-(R+D-6h-D) x 3d-(D-6h-D); exact timing of D & R not given | 2x3=6    | 100 mg/kg x 2/d x 10d                 | [75]  |
|             | D daily x 1w-(R+D) x 2w-D daily x 1w; exact timing of D & R not given   | 8x2=16   | 100 mg/kg/d x 4w                      | [71]  |
| Oxaliplatin | (D+R) daily x 10d; timing not given                                     | 2x10=20  | 1mg/kg/d x 10d                        | [83]  |
|             | (D-4d-D); R x 10d; schedule, timing not given                           | 2x10=20  | 4, 5, 6, or 7 mg/kg/d x 2d (4d apart) | [83]  |
| Sunitinib   | (D-2h-R) x 5 over 7d: exact schedule not clear                          | 2x5=10   | 40 mg/kg/d x 5d                       | [97]  |
|             | D x 3d-(D, R)d 4 & 5 + 7 more D (daily)                                 | 10x2=20  | 40mg/kg/d x 12d                       | [102] |
|             | (D-1h-R) x 5d                                                           | 1x5=5    | 1.3mg/mouse/d x 5d                    | [94]  |
|             | (R x 1/d x 5d)-24h-(D x 1/d x 5d)                                       | 3 x 5=15 | 1.2mg/mouse/d x 5d                    | [94]  |
|             | (D-1h-R) x 1/d x 5d                                                     | 3 x 5=15 | 1.2mg/mouse/d x 5d                    | [94]  |
|             | (D ≤ 30min-R)/d on d1-5, 7, 8 (7 fx)                                    | 3x7=21   | 40 mg/kg/d x 7 (d1-5, 7, 8)           | [101] |
|             | (D-2h-R)/d x 5d                                                         | 2x5=10   | 40mg/kg/d x 5d                        | [97]  |

Preclinical efficacy of 10 drug-radiation combinations, Supplement

|             |                                                                                                     |         |                                                                                     |            |
|-------------|-----------------------------------------------------------------------------------------------------|---------|-------------------------------------------------------------------------------------|------------|
|             | (D $\leq$ 30min-R daily on d1-6)-(D-8h-D) on d9-12, 15-17, 21 and thereafter                        | 3x6=18  | 40 mg/kg /d x 6d, then 20 mg/kg x 2/d on d9-12, 15-17, 21 and for duration of study | [101]      |
|             | R x 5 on d1-5; D x 1/d on d 1-7; timing of D & R on d1-5 not given                                  | 5x5=25  | 40 mg/kg/d x 7d                                                                     | [95]       |
|             | (D $\geq$ 30min-R) x 5/w x 3w                                                                       | 2x15=30 | 60 mg/kg/d x 5/w for duration                                                       | [98]       |
|             | (D $\geq$ 30min-R) x 5/w x 2w “or until onset of symptoms”                                          | 6x10=60 | 60 mg/kg/d x 5/w for duration                                                       | [98]       |
| Thalidomide | [none]                                                                                              | --      | --                                                                                  | --         |
| Vorinostat  | (D-1h-R) on d 1, 3, 5                                                                               | 1x3=3   | 150 mg/kg/d x 3d                                                                    | [117]      |
|             | (D-3h-R) x 4d                                                                                       | 2x4=8   | 100 mg/kg/d x 4d                                                                    | [115, 121] |
|             | (D-12h-R) x 4d                                                                                      | 2x4=8   | 100 mg/kg/d x 4d                                                                    | [115]      |
|             | D-24h-(D, R)/d x 3d-11 more D; D x 5/w x 3w; exact schedule, timing not given for days when R given | 3x3=9   | 100 mg/kg x 15<br>(5x/w x 3w)                                                       | [125]      |
|             | (D-3h-R) x 5d                                                                                       | 2x5=10  | 100 mg/kg/d x 5d                                                                    | [115]      |
|             | (D-12h-R) x 5d                                                                                      | 2x5=10  | 100 mg/kg/d x 5d                                                                    | [115]      |

**Supplementary Table 6. Effectiveness of 10 drugs in combination with radiation.** Drug dose and schedule were not considered here, but were subsequently examined for Supplementary Table 7 (below).

| Drug                  | # Tumor lines studied <i>in vitro</i> &/or <i>in vivo</i> * | Total # Experiments, <i>in vitro</i> and <i>in vivo</i> | Results <i>in vitro</i> , useable expts. |                                              |            | Results <i>in vivo</i> , useable expts. |
|-----------------------|-------------------------------------------------------------|---------------------------------------------------------|------------------------------------------|----------------------------------------------|------------|-----------------------------------------|
|                       |                                                             |                                                         | Positive (+) / negative(-)               |                                              |            | # +/- ***                               |
|                       |                                                             |                                                         | # with DMF, +/- **                       | # additional with subjective results, +/- ** | Total, +/- |                                         |
| AZD6244               | 7                                                           | 16                                                      | 11/1                                     | 0/0                                          | 11/1       | 1/3                                     |
| Bortezomib            | 26                                                          | 51                                                      | 7/3                                      | 5/1                                          | 12/4       | 3/4                                     |
| DMAG                  | 11                                                          | 25                                                      | 14/3                                     | 7/0                                          | 21/3       | 1/0                                     |
| Erlotinib             | 73                                                          | 84                                                      | 10/8                                     | 0/0                                          | 10/8       | 1/9                                     |
| Gefitinib             | 74                                                          | 146                                                     | 18/1                                     | 18/1                                         | 36/2       | 3/7                                     |
| Lapatinib             | 15                                                          | 20                                                      | 4/3                                      | 0/0                                          | 4/3        | 1/2                                     |
| Oxaliplatin           | 19                                                          | 54                                                      | 0/0                                      | 0/0                                          | 0/0        | 4/6                                     |
| Lipoxal <sup>TM</sup> | 2                                                           | 8                                                       | 0/0                                      | 1/0                                          | 1/0        | 3/2                                     |
| Sunitinib             | 16                                                          | 30                                                      | 0/1                                      | 0/0                                          | 0/0        | 1/15                                    |
| Thalidomide           | 6                                                           | 18                                                      | 3/0                                      | 0/0                                          | 3/0        | 1/4                                     |
| Vorinostat            | 33                                                          | 65                                                      | 0/0                                      | 0/0                                          | 0/0        | 7/5                                     |
| Totals                | 282                                                         | 517                                                     | 67/20                                    | 31/2                                         | 98/21      | 26/57                                   |
|                       | Drug-tumor line combinations                                |                                                         |                                          |                                              |            |                                         |

## Preclinical efficacy of 10 drug-radiation combinations, Supplement

\* Note: the numbers in Fig. 1 did not break down the data by tumor line: some papers used more than one tumor line.

\*\* “Useable” was defined for *in vitro* experiments as those conducted using clonogenic assays and having drug concentrations at or below those achievable in patients ( $\leq C_{max}$  or  $\leq$ serum concentrations at the MTD).

Experiments with missing or unclear information on drug or radiation doses or schedules or with uninterpretable data were not included.  $DMF > 1.1 = +$ ;  $DMF \leq 1.1 = -$ . Experiments quantified by other measures or other estimates of results were included in “additional subjective results.” Likely enhancement or sensitization = +; likely additive at most = -.

\*\*\* “Useable” was defined for *in vivo* experiments as those with calculated and estimated enhancement from growth delay or survival studies and those with DMFs from TCD50 experiments. Experiments with missing or unclear information on drug or radiation doses or schedules or uninterpretable data were not included. Those with multi-day schedules in which exact timing was not given for the days of combined treatment were considered acceptable for this count.

Supplementary Table 7. Summary of findings

| Drug       | # Tumor lines with <i>in vitro</i> & <i>in vivo</i> data in agreement/# with both <i>in vitro</i> & <i>in vivo</i> data | Summary of findings; “Both <i>in vitro</i> & <i>in vivo</i> ”, below, indicates tumor lines for which both <i>in vitro</i> and <i>in vivo</i> data were available and useable                                                                                                                                                                                                                          |
|------------|-------------------------------------------------------------------------------------------------------------------------|--------------------------------------------------------------------------------------------------------------------------------------------------------------------------------------------------------------------------------------------------------------------------------------------------------------------------------------------------------------------------------------------------------|
| AZD6244    | 1/4                                                                                                                     | <p><i>In vitro</i>: DMFs 1.13-2.0, varied with tumor line, drug dose &amp; schedule; “simultaneous” drug and irradiation negative;</p> <p>Both <i>in vitro</i> and <i>in vivo</i>: only 1 of 4 was positive in both, with <i>in vitro</i> DMFs 1.9-2.0; all <i>in vivo</i> studies had <i>in vitro</i> studies with the same tumor lines</p>                                                           |
| Bortezomib | 1/1                                                                                                                     | <p><i>In vitro</i>: DMFs = 2.25 with 100nM, <math>\leq 1.55</math> with <math>\leq 10</math>nM;</p> <p>Both <i>in vitro</i> &amp; <i>in vivo</i>: one tumor line only: DMF <i>in vitro</i> = 1.16, positive <i>in vivo</i></p> <p><i>In vivo</i>: in 2 studies, enhancement with 2 fractions, but not with 10 fractions; in other cases, drug doses and schedules varied, no clear pattern emerged</p> |
| DMAG       | 1/1                                                                                                                     | <p><i>In vitro</i>: DMFs 1.3-1.9 with 10-50nM; “enhancement” also with 100nM (not quantified);</p> <p>Both <i>in vitro</i> &amp; <i>in vivo</i>: one study: enhancement suggested</p>                                                                                                                                                                                                                  |
| Erlotinib  | 2/2                                                                                                                     | <p><i>In vitro</i>: Of 9 cell lines tested identically (2<math>\mu</math>M, D-1h-R schedule), 6 had DMFs of 1.15-1.44, and 3 were negative (DMF<math>\leq 1.1</math>); no <i>in vivo</i> data available on these lines</p>                                                                                                                                                                             |

Preclinical efficacy of 10 drug-radiation combinations, Supplement

|                       |     |                                                                                                                                                                                                                                                                                                                                                                                                                                                                                                    |
|-----------------------|-----|----------------------------------------------------------------------------------------------------------------------------------------------------------------------------------------------------------------------------------------------------------------------------------------------------------------------------------------------------------------------------------------------------------------------------------------------------------------------------------------------------|
|                       |     | <p>Both <i>in vitro</i> &amp; <i>in vivo</i>: 2 tumor lines tested, all negative</p> <p><i>In vivo</i>: 1 with DMF=1.13 in TCD50 assay, 6 others negative</p>                                                                                                                                                                                                                                                                                                                                      |
| Gefitinib             | 1/4 | <p><i>In vitro</i>: DMFs=1.12-3.4 @ drug doses 0.01-0.10<math>\mu</math>M, various schedules and tumor lines; in 2 of 3 cell lines, DMFs varied with schedule; in 6 of 7 cell lines tested at multiple drug doses, no DMFs were available; in 1 cell line, DMFs=1.30-1.56 @ drug doses 0.01-0.10<math>\mu</math>M</p> <p>Both <i>in vitro</i> &amp; <i>in vivo</i>: 1 line: positive in both; 3 lines, both positives and negatives</p> <p><i>In vivo</i>: More negative results than positive</p> |
| Lapatinib             | 0/0 | <p><i>In vitro</i>: one line tested @ 0.6 &amp; 2.4<math>\mu</math>M, DMFs=1.13- &amp; 1.30, respectively; 5 other lines tested at single drug doses &amp; schedules, 2 with DMFs of 1.16 and 1.4, respectively, and 3 negative.</p> <p><i>In vivo</i>: mixed results may be cell line-specific</p>                                                                                                                                                                                                |
| Oxaliplatin           | 0/0 | <p><i>In vitro</i>: All experiments carried out at concentrations above those clinically achievable</p> <p><i>In vivo</i>: mixed results; may be schedule-dependent</p>                                                                                                                                                                                                                                                                                                                            |
| Lipoxal <sup>TM</sup> | 0/1 | <p><i>In vitro</i>: one study, in glioblastoma, suggests enhancement; other studies uninterpretable</p> <p><i>In vivo</i>: little or no increase of survival time in above line; 3 schedules in colorectal line: all probably &gt;additive growth delay</p>                                                                                                                                                                                                                                        |
| Sunitinib             | 0/0 | <p><i>In vitro</i>: one study, a breast cancer line: negative</p> <p><i>In vivo</i>: 15 studies negative; 1 positive: a glioma line: large effect on tumor size 5 days after</p>                                                                                                                                                                                                                                                                                                                   |

Preclinical efficacy of 10 drug-radiation combinations, Supplement

|             |      |                                                                                                                                                                                                                                                                                                          |
|-------------|------|----------------------------------------------------------------------------------------------------------------------------------------------------------------------------------------------------------------------------------------------------------------------------------------------------------|
|             |      | treatment                                                                                                                                                                                                                                                                                                |
| Thalidomide | 0/0  | <i>In vitro</i> : esophageal tumor line: DMFs 1.15-1.7 @ 2-6 $\mu$ M, all with same schedule<br><br><i>In vivo</i> : glioma line: large effect; mouse fibrosarcoma: intratumoral injection negative in 4 schedules                                                                                       |
| Vorinostat  | 0/0  | <i>In vitro</i> : All experiments carried out at concentrations above those clinically achievable<br><br><i>In vivo</i> : 2 colorectal lines: with similar drug doses & schedules, each had 2+ and 1- studies; other lines about evenly divided with + and – studies with various drug doses & schedules |
| Totals      | 6/13 |                                                                                                                                                                                                                                                                                                          |



## References, Papers surveyed

- [1] Chung EJ, Brown JM, Asano H, Mandler M, Burgan WE, Carter D, Camphausen K, Citrin DE (2009). *In vitro* and *in vivo* radiosensitization with AZD6244 (ARRY-142886), an inhibitor of mitogen-activated protein kinase/extracellular signal-regulated kinase 1/2 kinase *Clinical cancer research : an official journal of the American Association for Cancer Research* **15**, 3050-3057.
- [2] Chung EJ, Urick ME, Kurshan N, Shield W, 3rd, Asano H, Smith PD, Scroggins BS, Burkeen J, Citrin DE (2013). MEK1/2 inhibition enhances the radiosensitivity of cancer cells by downregulating survival and growth signals mediated by EGFR ligands *International journal of oncology* **42**, 2028-2036.
- [3] Shannon AM, Telfer BA, Smith PD, Babur M, Logie A, Wilkinson RW, Debray C, Stratford IJ, Williams KJ, Wedge SR (2009). The mitogen-activated protein/extracellular signal-regulated kinase kinase 1/2 inhibitor AZD6244 (ARRY-142886) enhances the radiation responsiveness of lung and colorectal tumor xenografts *Clinical cancer research : an official journal of the American Association for Cancer Research* **15**, 6619-6629.
- [4] Urick ME, Chung EJ, Shield WP, 3rd, Gerber N, White A, Sowers A, Thetford A, Camphausen K, Mitchell J, Citrin DE (2011). Enhancement of 5-fluorouracil-induced *in vitro* and *in vivo* radiosensitization with MEK inhibition *Clinical cancer research : an official journal of the American Association for Cancer Research* **17**, 5038-5047.
- [5] Cao W, Shiverick KT, Namiki K, Sakai Y, Porvasnik S, Urbanek C, Rosser CJ (2008). Docetaxel and bortezomib downregulate Bcl-2 and sensitize PC-3-Bcl-2 expressing prostate cancer cells to irradiation *World journal of urology* **26**, 509-516.
- [6] Goel A, Dispenzieri A, Greipp PR, Witzig TE, Mesa RA, Russell SJ (2005). PS-341-mediated selective targeting of multiple myeloma cells by synergistic increase in ionizing radiation-induced apoptosis *Experimental hematology* **33**, 784-795.
- [7] Goktas S, Baran Y, Ural AU, Yazici S, Aydur E, Basal S, Avcu F, Pekel A, Dirican B, Beyzadeoglu M (2010). Proteasome inhibitor bortezomib increases radiation sensitivity in androgen independent human prostate cancer cells *Urology* **75**, 793-798.
- [8] Ha K, Fiskus W, Rao R, Balusu R, Venkannagari S, Nalabothula NR, Bhalla KN (2011). Hsp90 inhibitor-mediated disruption of chaperone association of ATR with hsp90 sensitizes cancer cells to DNA damage *Molecular cancer therapeutics* **10**, 1194-1206.
- [9] Huang CY, Wei CC, Chen KC, Chen HJ, Cheng AL, Chen KF (2012). Bortezomib enhances radiation-induced apoptosis in solid tumors by inhibiting CIP2A *Cancer letters* **317**, 9-15.
- [10] Kamer S, Ren Q, Dicker AP (2009). Differential radiation sensitization of human cervical cancer cell lines by the proteasome inhibitor velcade (bortezomib, PS-341) *Archives of gynecology and obstetrics* **279**, 41-46.
- [11] Labussiere M, Pinel S, Vandamme M, Plenat F, Chastagner P (2011). Radiosensitizing properties of bortezomib depend on therapeutic schedule *International journal of radiation oncology, biology, physics* **79**, 892-900.
- [12] Lioni M, Noma K, Snyder A, Klein-Szanto A, Diehl JA, Rustgi AK, Herlyn M, Smalley KS (2008). Bortezomib induces apoptosis in esophageal squamous cell carcinoma cells through activation of the p38 mitogen-activated protein kinase pathway *Molecular cancer therapeutics* **7**, 2866-2875.
- [13] Rae C, Tesson M, Babich JW, Boyd M, Mairs RJ (2013). Radiosensitization of noradrenaline transporter-expressing tumour cells by proteasome inhibitors and the role of reactive oxygen species *EJNMMI research* **3**, 73.
- [14] Russo SM, Tepper JE, Baldwin AS, Jr., Liu R, Adams J, Elliott P, Cusack JC, Jr. (2001). Enhancement of radiosensitivity by proteasome inhibition: implications for a role of NF-kappaB *International journal of radiation oncology, biology, physics* **50**, 183-193.
- [15] Tamatani T, Takamaru N, Hara K, Kinouchi M, Kuribayashi N, Ohe G, Uchida D, Fujisawa K, Nagai H, Miyamoto Y (2013). Bortezomib-enhanced radiosensitization through the suppression of radiation-

- induced nuclear factor-kappaB activity in human oral cancer cells *International journal of oncology* **42**, 935-944.
- [16] Weber CN, Cerniglia GJ, Maity A, Gupta AK (2007). Bortezomib sensitizes human head and neck carcinoma cells SQ20B to radiation *Cancer biology & therapy* **6**, 156-159.
- [17] Yamashita AS, Baia GS, Ho JS, Velarde E, Wong J, Gallia GL, Belzberg AJ, Kimura ET, Riggins GJ (2014). Preclinical evaluation of the combination of mTOR and proteasome inhibitors with radiotherapy in malignant peripheral nerve sheath tumors *Journal of neuro-oncology* **118**, 83-92.
- [18] Avondoglio D, Scott T, Kil WJ, Sproull M, Tofilon PJ, Camphausen K (2009). High throughput evaluation of gamma-H2AX *Radiation oncology* **4**, 31.
- [19] Bull EE, Dote H, Brady KJ, Burgan WE, Carter DJ, Cerra MA, Oswald KA, Hollingshead MG, Camphausen K, Tofilon PJ (2004). Enhanced tumor cell radiosensitivity and abrogation of G2 and S phase arrest by the Hsp90 inhibitor 17-(dimethylaminoethylamino)-17-demethoxygeldanamycin *Clinical cancer research : an official journal of the American Association for Cancer Research* **10**, 8077-8084.
- [20] Dote H, Cerna D, Burgan WE, Camphausen K, Tofilon PJ (2005). ErbB3 expression predicts tumor cell radiosensitization induced by Hsp90 inhibition *Cancer research* **65**, 6967-6975.
- [21] Koll TT, Feis SS, Wright MH, Teniola MM, Richardson MM, Robles AI, Bradsher J, Capala J, Varticovski L (2008). HSP90 inhibitor, DMAG, synergizes with radiation of lung cancer cells by interfering with base excision and ATM-mediated DNA repair *Molecular cancer therapeutics* **7**, 1985-1992.
- [22] Cerniglia GJ, Pore N, Tsai JH, Schultz S, Mick R, Choe R, Xing X, Durduran T, Yodh AG, Evans SM, et al. (2009). Epidermal growth factor receptor inhibition modulates the microenvironment by vascular normalization to improve chemotherapy and radiotherapy efficacy *PloS one* **4**, e6539.
- [23] Chinnaiyan P, Huang S, Vallabhaneni G, Armstrong E, Varambally S, Tomlins SA, Chinnaiyan AM, Harari PM (2005). Mechanisms of enhanced radiation response following epidermal growth factor receptor signaling inhibition by erlotinib (Tarceva) *Cancer research* **65**, 3328-3335.
- [24] Gurtner K, Deuse Y, Butof R, Schaal K, Eicheler W, Oertel R, Grenman R, Thames H, Yaromina A, Baumann M, et al. (2011). Diverse effects of combined radiotherapy and EGFR inhibition with antibodies or TK inhibitors on local tumour control and correlation with EGFR gene expression *Radiotherapy and oncology : journal of the European Society for Therapeutic Radiology and Oncology* **99**, 323-330.
- [25] Kim JC, Ali MA, Nandi A, Mukhopadhyay P, Choy H, Cao C, Saha D (2005). Correlation of HER1/EGFR expression and degree of radiosensitizing effect of the HER1/EGFR-tyrosine kinase inhibitor erlotinib *Indian journal of biochemistry & biophysics* **42**, 358-365.
- [26] Morgan MA, Parsels LA, Kollar LE, Normolle DP, Maybaum J, Lawrence TS (2008). The combination of epidermal growth factor receptor inhibitors with gemcitabine and radiation in pancreatic cancer *Clinical cancer research : an official journal of the American Association for Cancer Research* **14**, 5142-5149.
- [27] Sahlberg SH, Spiegelberg D, Lennartsson J, Nygren P, Glimelius B, Stenerlöw B (2012). The effect of a dimeric Affibody molecule (Z<sub>EGFR:1907</sub>)<sub>2</sub> targeting EGFR in combination with radiation in colon cancer cell lines *International journal of oncology* **40**, 176-184.
- [28] Sarkaria JN, Carlson BL, Schroeder MA, Grogan P, Brown PD, Giannini C, Ballman KV, Kitange GJ, Guha A, Pandita A, et al. (2006). Use of an orthotopic xenograft model for assessing the effect of epidermal growth factor receptor amplification on glioblastoma radiation response *Clinical cancer research : an official journal of the American Association for Cancer Research* **12**, 2264-2271.
- [29] Toulany M, Minjgee M, Kehlbach R, Chen J, Baumann M, Rodemann HP (2010). ErbB2 expression through heterodimerization with erbB1 is necessary for ionizing radiation- but not EGF-induced activation of Akt survival pathway *Radiotherapy and oncology : journal of the European Society for Therapeutic Radiology and Oncology* **97**, 338-345.

- [30] Wang M, Kern AM, Hulskotter M, Greninger P, Singh A, Pan Y, Chowdhury D, Krause M, Baumann M, Benes CH, et al. (2014). EGFR-mediated chromatin condensation protects KRAS-mutant cancer cells against ionizing radiation *Cancer research* **74**, 2825-2834.
- [31] Wang M, Morsbach F, Sander D, Gheorghiu L, Nanda A, Benes C, Kriegs M, Krause M, Dikomey E, Baumann M, et al. (2011). EGF receptor inhibition radiosensitizes NSCLC cells by inducing senescence in cells sustaining DNA double-strand breaks *Cancer research* **71**, 6261-6269.
- [32] Wang Y, Yuan JL, Zhang YT, Ma JJ, Xu P, Shi CH, Zhang W, Li YM, Fu Q, Zhu GF, et al. (2013). Inhibition of both EGFR and IGF1R sensitized prostate cancer cells to radiation by synergistic suppression of DNA homologous recombination repair *PLoS one* **8**, e68784.
- [33] Zhang HH, Yuan TZ, Li J, Liang Y, Huang LJ, Ye JC, Zheng RH, Xie GF, Zhang XP (2013). Erlotinib: An enhancer of radiation therapy in nasopharyngeal carcinoma *Experimental and therapeutic medicine* **6**, 1062-1066.
- [34] Zhuang HQ, Bo QF, Yuan ZY, Wang J, Zhao LJ, Wang P (2013). The different radiosensitivity when combining erlotinib with radiation at different administration schedules might be related to activity variations in c-MET-PI3K-AKT signal transduction *OncoTargets and therapy* **6**, 603-608.
- [35] Andersson U, Johannson D, Behnam-Motlagh P, Johannson M, Malmer B (2007). Treatment schedule is of importance when gefitinib is combined with irradiation of glioma and endothelial cells *in vitro Acta oncologica* **46**, 951-960.
- [36] Bergkvist GT, Argyle DJ, Pang LY, Muirhead R, Yool DA (2011). Studies on the inhibition of feline EGFR in squamous cell carcinoma: enhancement of radiosensitivity and rescue of resistance to small molecule inhibitors *Cancer biology & therapy* **11**, 927-937.
- [37] Bianco C, Tortora G, Bianco R, Caputo R, Veneziani BM, Caputo R, Damiano V, Troiani T, Fontanini G, Raben D, et al. (2002). Enhancement of antitumor activity of ionizing radiation by combined treatment with the selective epidermal growth factor receptor-tyrosine kinase inhibitor ZD1839 (Iressa) *Clinical cancer research : an official journal of the American Association for Cancer Research* **8**, 3250-3258.
- [38] Bokobza SM, Jiang Y, Weber AM, Devery AM, Ryan AJ (2014). Short-course treatment with gefitinib enhances curative potential of radiation therapy in a mouse model of human non-small cell lung cancer *International journal of radiation oncology, biology, physics* **88**, 947-954.
- [39] Burdak-Rothkamm S, Rube CE, Nguyen TP, Ludwig D, Feldmann K, Wiegel T, Rube C (2005). Radiosensitivity of tumor cell lines after pretreatment with the EGFR tyrosine kinase inhibitor ZD1839 (Iressa) *Strahlentherapie und Onkologie : Organ der Deutschen Rontgengesellschaft [et al]* **181**, 197-204.
- [40] Cengel KA, Voong KR, Chandrasekaran S, Maggiorella L, Brunner TB, Stanbridge E, Kao GD, McKenna WG, Bernhard EJ (2007). Oncogenic K-Ras signals through epidermal growth factor receptor and wild-type H-Ras to promote radiation survival in pancreatic and colorectal carcinoma cells *Neoplasia* **9**, 341-348.
- [41] Chen FH, Fu SY, Yang YC, Wang CC, Chiang CS, Hong JH (2013). Combination of vessel-targeting agents and fractionated radiation therapy: the role of the SDF-1/CXCR4 pathway *International journal of radiation oncology, biology, physics* **86**, 777-784.
- [42] Colquhoun AJ, McHugh LA, Tulchinsky E, Kriajevska M, Mellon JK (2007). Combination treatment with ionising radiation and gefitinib ('Iressa', ZD1839), an epidermal growth factor receptor (EGFR) inhibitor, significantly inhibits bladder cancer cell growth *in vitro* and *in vivo* *Journal of radiation research* **48**, 351-360.
- [43] Dominguez-Escrig JL, Kelly JD, Neal DE, King SM, Davies BR (2004). Evaluation of the therapeutic potential of the epidermal growth factor receptor tyrosine kinase inhibitor gefitinib in preclinical models of bladder cancer *Clinical cancer research : an official journal of the American Association for Cancer Research* **10**, 4874-4884.

- [44] Epperly MW, Franicola D, Zhang X, Nie S, Greenberger JS (2006). Effect of EGFR antagonists gefitinib (Iressa) and C225 (Cetuximab) on MnSOD-plasmid liposome transgene radiosensitization of a murine squamous cell carcinoma cell line *In vivo* **20**, 791-796.
- [45] Fukutome M, Maebayashi K, Nasu S, Seki K, Mitsuhashi N (2006). Enhancement of radiosensitivity by dual inhibition of the HER family with ZD1839 ("Iressa") and trastuzumab ("Herceptin") *International journal of radiation oncology, biology, physics* **66**, 528-536.
- [46] Georger B, Gaspar N, Opolon P, Morizet J, Devanz P, Lecluse Y, Valent A, Lacroix L, Grill J, Vassal G (2008). EGFR tyrosine kinase inhibition radiosensitizes and induces apoptosis in malignant glioma and childhood ependymoma xenografts *International journal of cancer Journal international du cancer* **123**, 209-216.
- [47] Huang SM, Li J, Armstrong EA, Harari PM (2002). Modulation of radiation response and tumor-induced angiogenesis after epidermal growth factor receptor inhibition by ZD1839 (Iressa) *Cancer research* **62**, 4300-4306.
- [48] Kajanne R, Miettinen P, Tenhunen M, Leppa S (2009). Transcription factor AP-1 promotes growth and radioresistance in prostate cancer cells *International journal of oncology* **35**, 1175-1182.
- [49] Kang KB, Zhu C, Wong YL, Gao Q, Ty A, Wong MC (2012). Gefitinib radiosensitizes stem-like glioma cells: inhibition of epidermal growth factor receptor-Akt-DNA-PK signaling, accompanied by inhibition of DNA double-strand break repair *International journal of radiation oncology, biology, physics* **83**, e43-52.
- [50] Lin HQ, Meriaty H, Katsifis A (2011). Prediction of synergistic antitumour effect of gefitinib and radiation *in vitro Anticancer research* **31**, 2883-2888.
- [51] Lopez JP, Wang-Rodriguez J, Chang CY, Sneh G, Yu MA, Pardo FS, Aguilera J, Ongkeko WM (2008). Gefitinib (Iressa) potentiates the effect of ionizing radiation in thyroid cancer cell lines *The Laryngoscope* **118**, 1372-1376.
- [52] Maddineni SB, Sangar VK, Hendry JH, Margison GP, Clarke NW (2005). Differential radiosensitisation by ZD1839 (Iressa), a highly selective epidermal growth factor receptor tyrosine kinase inhibitor in two related bladder cancer cell lines *British journal of cancer* **92**, 125-130.
- [53] Magné N, Fischel JL, Dubreuil A, Formento P, Marcie S, Lagrange JL, Milano G (2002). Sequence-dependent effects of ZD1839 ('Iressa') in combination with cytotoxic treatment in human head and neck cancer *British journal of cancer* **86**, 819-827.
- [54] Miyata H, Sasaki T, Kuwahara K, Serikawa M, Chayama K (2006). The effects of ZD1839 (Iressa), a highly selective EGFR tyrosine kinase inhibitor, as a radiosensitiser in bile duct carcinoma cell lines *International journal of oncology* **28**, 915-921.
- [55] Palumbo I, Piattoni S, Valentini V, Marini V, Contavalli P, Calzuola M, Vecchio FM, Cecchini D, Falzetti F, Aristei C (2014). Gefitinib enhances the effects of combined radiotherapy and 5-fluorouracil in a colorectal cancer cell line *International journal of colorectal disease* **29**, 31-41.
- [56] Park JS, Jun HJ, Cho MJ, Cho KH, Lee JS, Zo JI, Pyo H (2006). Radiosensitivity enhancement by combined treatment of celecoxib and gefitinib on human lung cancer cells *Clinical cancer research : an official journal of the American Association for Cancer Research* **12**, 4989-4999.
- [57] Park SY, Kim YM, Pyo H (2010). Gefitinib radiosensitizes non-small cell lung cancer cells through inhibition of ataxia telangiectasia mutated *Molecular cancer* **9**, 222.
- [58] Raben D, Bianco C, Damiano V, Bianco R, Melisi D, Mignogna C, D'Armiento FP, Cionini L, Bianco AR, Tortora G, et al. (2004). Antitumor activity of ZD6126, a novel vascular-targeting agent, is enhanced when combined with ZD1839, an epidermal growth factor receptor tyrosine kinase inhibitor, and potentiates the effects of radiation in a human non-small cell lung cancer xenograft model *Molecular cancer therapeutics* **3**, 977-983.
- [59] Sato Y, Ebara T, Sunaga N, Takahashi T, Nakano T (2012). Interaction of radiation and gefitinib on a human lung cancer cell line with mutant EGFR gene *in vitro Anticancer research* **32**, 4877-4881.

- [60] She Y, Lee F, Chen J, Haimovitz-Friedman A, Miller VA, Rusch VR, Kris MG, Sirotiak FM (2003). The epidermal growth factor receptor tyrosine kinase inhibitor ZD1839 selectively potentiates radiation response of human tumors in nude mice, with a marked improvement in therapeutic index *Clinical cancer research : an official journal of the American Association for Cancer Research* **9**, 3773-3778.
- [61] Shintani S, Kiyota A, Mihara M, Sumida T, Kayahara H, Nakashiro K, Hamakawa H (2003). Enhancement of radiosensitivity in head and neck cancer cells by ZD1839 ('IRESSA'), a selective epidermal growth factor receptor tyrosine kinase inhibitor *American journal of clinical oncology* **26**, e150-156.
- [62] Shintani S, Li C, Mihara M, Terakado N, Yano J, Nakashiro K, Hamakawa H (2003). Enhancement of tumor radioresponse by combined treatment with gefitinib (Iressa, ZD1839), an epidermal growth factor receptor tyrosine kinase inhibitor, is accompanied by inhibition of DNA damage repair and cell growth in oral cancer *International journal of cancer Journal international du cancer* **107**, 1030-1037.
- [63] Solomon B, Hagekyriakou J, Trivett MK, Stacker SA, McArthur GA, Cullinane C (2003). EGFR blockade with ZD1839 ("Iressa") potentiates the antitumor effects of single and multiple fractions of ionizing radiation in human A431 squamous cell carcinoma. Epidermal growth factor receptor *International journal of radiation oncology, biology, physics* **55**, 713-723.
- [64] Stea B, Falsey R, Kislin K, Patel J, Glanzberg H, Carey S, Ambrad AA, Meuliet EJ, Martinez JD (2003). Time and dose-dependent radiosensitization of the glioblastoma multiforme U251 cells by the EGF receptor tyrosine kinase inhibitor ZD1839 ('Iressa') *Cancer letters* **202**, 43-51.
- [65] Taira N, Doihara H, Oota T, Hara F, Shien T, Takahashi H, Yoshitomi S, Ishibe Y, Shimizu N (2006). Gefitinib, an epidermal growth factor receptor blockade agent, shows additional or synergistic effects on the radiosensitivity of esophageal cancer cells *in vitro Acta medica Okayama* **60**, 25-34.
- [66] Tanaka T, Munshi A, Brooks C, Liu J, Hobbs ML, Meyn RE (2008). Gefitinib radiosensitizes non-small cell lung cancer cells by suppressing cellular DNA repair capacity *Clinical cancer research : an official journal of the American Association for Cancer Research* **14**, 1266-1273.
- [67] Williams KJ, Telfer BA, Stratford IJ, Wedge SR (2002). ZD1839 ('Iressa'), a specific oral epidermal growth factor receptor-tyrosine kinase inhibitor, potentiates radiotherapy in a human colorectal cancer xenograft model *British journal of cancer* **86**, 1157-1161.
- [68] Yabuuchi S, Katayose Y, Oda A, Mizuma M, Shirasou S, Sasaki T, Yamamoto K, Oikawa M, Rikiyama T, Onogawa T, et al. (2009). ZD1839 (IRESSA) stabilizes p27Kip1 and enhances radiosensitivity in cholangiocarcinoma cell lines *Anticancer research* **29**, 1169-1180.
- [69] Zhuang HQ, Sun J, Yuan ZY, Wang J, Zhao LJ, Wang P, Ren XB, Wang CL (2009). Radiosensitizing effects of gefitinib at different administration times *in vitro Cancer science* **100**, 1520-1525.
- [70] Zhuang HQ, Wang J, Yuan ZY, Zhao LJ, Wang P, Wang CL (2009). The drug-resistance to gefitinib in PTEN low expression cancer cells is reversed by irradiation *in vitro Journal of experimental & clinical cancer research : CR* **28**, 123.
- [71] Diaz R, Nguewa PA, Parrondo R, Perez-Stable C, Manrique I, Redrado M, Catena R, Collantes M, Penuelas I, Diaz-Gonzalez JA, et al. (2010). Antitumor and antiangiogenic effect of the dual EGFR and HER-2 tyrosine kinase inhibitor lapatinib in a lung cancer model *BMC cancer* **10**, 188.
- [72] Kimple RJ, Vaseva AV, Cox AD, Baerman KM, Calvo BF, Tepper JE, Shields JM, Sartor CI (2010). Radiosensitization of epidermal growth factor receptor/HER2-positive pancreatic cancer is mediated by inhibition of Akt independent of ras mutational status *Clinical cancer research : an official journal of the American Association for Cancer Research* **16**, 912-923.
- [73] Qiao B, Kerr M, Grose B, Teo MT, Knowles MA, Bristow RG, Phillips RM, Kiltie AE (2013). Imatinib radiosensitizes bladder cancer by targeting homologous recombination *Cancer research* **73**, 1611-1620.
- [74] Sambade MJ, Camp JT, Kimple RJ, Sartor CI, Shields JM (2009). Mechanism of lapatinib-mediated radiosensitization of breast cancer cells is primarily by inhibition of the Raf>MEK>ERK mitogen-activated protein kinase cascade and radiosensitization of lapatinib-resistant cells restored by direct

- inhibition of MEK *Radiotherapy and oncology : journal of the European Society for Therapeutic Radiology and Oncology* **93**, 639-644.
- [75] Sambade MJ, Kimple RJ, Camp JT, Peters E, Livasy CA, Sartor CI, Shields JM (2010). Lapatinib in combination with radiation diminishes tumor regrowth in HER2+ and basal-like/EGFR+ breast tumor xenografts *International journal of radiation oncology, biology, physics* **77**, 575-581.
- [76] Zhou H, Kim YS, Peletier A, McCall W, Earp HS, Sartor CI (2004). Effects of the EGFR/HER2 kinase inhibitor GW572016 on EGFR- and HER2-overexpressing breast cancer cell line proliferation, radiosensitization, and resistance *International journal of radiation oncology, biology, physics* **58**, 344-352.
- [77] Altmeyer A, Jung AC, Ignat M, Benzina S, Denis JM, Gueulette J, Noel G, Mutter D, Bischoff P (2010). Pharmacological enhancement of autophagy induced in a hepatocellular carcinoma cell line by high-LET radiation *Anticancer research* **30**, 303-310.
- [78] Benzina S, Altmeyer A, Malek F, Dufour P, Denis JM, Gueulette J, Bischoff P (2008). High-LET radiation combined with oxaliplatin induce autophagy in U-87 glioblastoma cells *Cancer letters* **264**, 63-70.
- [79] Benzina S, Debomy F, Bergerat JP, Denis JM, Gueulette J, Dufour P, Bischoff P (2007). The cytotoxicity of high-linear energy transfer radiation is reinforced by oxaliplatin in human glioblastoma cells *Cancer letters* **254**, 54-62.
- [80] Charest G, Paquette B, Fortin D, Mathieu D, Sanche L (2010). Concomitant treatment of F98 glioma cells with new liposomal platinum compounds and ionizing radiation *Journal of neuro-oncology* **97**, 187-193.
- [81] Charest G, Sanche L, Fortin D, Mathieu D, Paquette B (2012). Glioblastoma treatment: bypassing the toxicity of platinum compounds by using liposomal formulation and increasing treatment efficiency with concomitant radiotherapy *International journal of radiation oncology, biology, physics* **84**, 244-249.
- [82] Charest G, Sanche L, Fortin D, Mathieu D, Paquette B (2013). Optimization of the route of platinum drugs administration to optimize the concomitant treatment with radiotherapy for glioblastoma implanted in the Fischer rat brain *Journal of neuro-oncology* **115**, 365-373.
- [83] Cividalli A, Ceciarelli F, Livdi E, Altavista P, Cruciani G, Marchetti P, Danesi DT (2002). Radiosensitization by oxaliplatin in a mouse adenocarcinoma: influence of treatment schedule *International journal of radiation oncology, biology, physics* **52**, 1092-1098.
- [84] Espinosa M, Martinez M, Aguilar JL, Mota A, De la Garza JG, Maldonado V, Melendez-Zajgla J (2005). Oxaliplatin activity in head and neck cancer cell lines *Cancer chemotherapy and pharmacology* **55**, 301-305.
- [85] Folkvord S, Flatmark K, Seierstad T, Røe K, Rasmussen H, Ree AH (2008). Inhibitory effects of oxaliplatin in experimental radiation treatment of colorectal carcinoma: does oxaliplatin improve 5-fluorouracil-dependent radiosensitivity? *Radiotherapy and oncology : journal of the European Society for Therapeutic Radiology and Oncology* **86**, 428-434.
- [86] Khan Z, Khan N, Tiwari RP, Patro IK, Prasad GB, Bisen PS (2010). Down-regulation of survivin by oxaliplatin diminishes radioresistance of head and neck squamous carcinoma cells *Radiotherapy and oncology : journal of the European Society for Therapeutic Radiology and Oncology* **96**, 267-273.
- [87] Kjellström J, Kjellén E, Johnsson A (2005). *In vitro* radiosensitization by oxaliplatin and 5-fluorouracil in a human colon cancer cell line *Acta oncologica* **44**, 687-693.
- [88] Magné N, Fischel JL, Formento P, Etienne MC, Dubreuil A, Marcie S, Lagrange JL, Milano G (2003). Oxaliplatin-5-fluorouracil and ionizing radiation. Importance of the sequence and influence of p53 status *Oncology* **64**, 280-287.
- [89] Morgan MA, Meirovitz A, Davis MA, Kollar LE, Hassan MC, Lawrence TS (2008). Radiotherapy combined with gemcitabine and oxaliplatin in pancreatic cancer cells *Translational oncology* **1**, 36-43.

- [90] Rave-Frank M, Schmidberger H, Christiansen H, Boll C, Lehmann J, Weiss E (2007). Comparison of the combined action of oxaliplatin or cisplatin and radiation in cervical and lung cancer cells *International journal of radiation biology* **83**, 41-47.
- [91] Tippayamontri T, Kotb R, Paquette B, Sanche L (2012). Synergism in concomitant chemoradiotherapy of cisplatin and oxaliplatin and their liposomal formulation in the human colorectal cancer HCT116 model *Anticancer research* **32**, 4395-4404.
- [92] Tippayamontri T, Kotb R, Sanche L, Paquette B (2014). New therapeutic possibilities of combined treatment of radiotherapy with oxaliplatin and its liposomal formulation, Lipoxal<sup>TM</sup>, in rectal cancer using xenograft in nude mice *Anticancer research* **34**, 5303-5312.
- [93] Yang YC, Chao KS, Lin CP, Chen YY, Wang KL, Chen YJ (2009). Oxaliplatin regulates DNA repair responding to ionizing radiation and enhances radiosensitivity of human cervical cancer cells *International journal of gynecological cancer : official journal of the International Gynecological Cancer Society* **19**, 782-786.
- [94] Brooks C, Sheu T, Bridges K, Mason K, Kuban D, Mathew P, Meyn R (2012). Preclinical evaluation of sunitinib, a multi-tyrosine kinase inhibitor, as a radiosensitizer for human prostate cancer *Radiation oncology* **7**, 154.
- [95] Casneuf VF, Demetter P, Boterberg T, Delrue L, Peeters M, Van Damme N (2009). Antiangiogenic versus cytotoxic therapeutic approaches in a mouse model of pancreatic cancer: an experimental study with a multitarget tyrosine kinase inhibitor (sunitinib), gemcitabine and radiotherapy *Oncology reports* **22**, 105-113.
- [96] Chung C, Jalali S, Foltz W, Burrell K, Wildgoose P, Lindsay P, Graves C, Camphausen K, Milosevic M, Jaffray D, et al. (2013). Imaging biomarker dynamics in an intracranial murine glioma study of radiation and antiangiogenic therapy *International journal of radiation oncology, biology, physics* **85**, 805-812.
- [97] Cuneo KC, Geng L, Fu A, Orton D, Hallahan DE, Chakravarthy AB (2008). SU11248 (sunitinib) sensitizes pancreatic cancer to the cytotoxic effects of ionizing radiation *International journal of radiation oncology, biology, physics* **71**, 873-879.
- [98] D'Amico R, Lei L, Kennedy BC, Sisti J, Ebiana V, Crisman C, Christensen JG, Gil O, Rosenfeld SS, Canoll P, et al. (2012). The addition of Sunitinib to radiation delays tumor growth in a murine model of glioblastoma *Neurological research* **34**, 252-261.
- [99] El Kaffas A, Al-Mahrouki A, Tran WT, Giles A, Czarnota GJ (2014). Sunitinib effects on the radiation response of endothelial and breast tumor cells *Microvascular research* **92**, 1-9.
- [100] Hillman GG, Singh-Gupta V, Al-Bashir AK, Yunker CK, Joiner MC, Sarkar FH, Abrams J, Haacke EM (2011). Monitoring sunitinib-induced vascular effects to optimize radiotherapy combined with soy isoflavones in murine xenograft tumor *Translational oncology* **4**, 110-121.
- [101] Schueneman AJ, Himmelfarb E, Geng L, Tan J, Donnelly E, Mendel D, McMahon G, Hallahan DE (2003). SU11248 maintenance therapy prevents tumor regrowth after fractionated irradiation of murine tumor models *Cancer research* **63**, 4009-4016.
- [102] Yoon SS, Stangenberg L, Lee YJ, Rothrock C, Dreyfuss JM, Baek KH, Waterman PR, Nielsen GP, Weissleder R, Mahmood U, et al. (2009). Efficacy of sunitinib and radiotherapy in genetically engineered mouse model of soft-tissue sarcoma *International journal of radiation oncology, biology, physics* **74**, 1207-1216.
- [103] Zwolak P, Jasinski P, Terai K, Gallus NJ, Ericson ME, Clohisy DR, Dudek AZ (2008). Addition of receptor tyrosine kinase inhibitor to radiation increases tumour control in an orthotopic murine model of breast cancer metastasis in bone *European journal of cancer* **44**, 2506-2517.
- [104] Ansiaux R, Baudelet C, Jordan BF, Beghein N, Sonveaux P, De Wever J, Martinive P, Gregoire V, Feron O, Gallez B (2005). Thalidomide radiosensitizes tumors through early changes in the tumor microenvironment *Clinical cancer research : an official journal of the American Association for Cancer Research* **11**, 743-750.

- [105] Epperly MW, Greenberger EE, Franicola D, Jacobs S, Greenberger JS (2006). Thalidomide radiosensitization of normal murine hematopoietic but not squamous cell carcinoma or multiple myeloma tumor cell lines *In vivo* **20**, 333-339.
- [106] Lee JI, Itasaka S, Kim JT, Nam DH (2006). Antiangiogenic agent, thalidomide increases the antitumor effect of single high dose irradiation (gamma knife radiosurgery) in the rat orthotopic glioma model *Oncology reports* **15**, 1163-1168.
- [107] Yu J, Liu F, Sun Z, Sun M, Sun S (2011). The enhancement of radiosensitivity in human esophageal carcinoma cells by thalidomide and its potential mechanism *Cancer biotherapy & radiopharmaceuticals* **26**, 219-227.
- [108] Baschnagel A, Russo A, Burgan WE, Carter D, Beam K, Palmieri D, Steeg PS, Tofilon P, Camphausen K (2009). Vorinostat enhances the radiosensitivity of a breast cancer brain metastatic cell line grown *in vitro* and as intracranial xenografts *Molecular cancer therapeutics* **8**, 1589-1595.
- [109] Blattmann C, Oertel S, Ehemann V, Thiemann M, Huber PE, Bischof M, Witt O, Deubzer HE, Kulozik AE, Debus J, et al. (2010). Enhancement of radiation response in osteosarcoma and rhabdomyosarcoma cell lines by histone deacetylase inhibition *International journal of radiation oncology, biology, physics* **78**, 237-245.
- [110] Blattmann C, Oertel S, Thiemann M, Weber KJ, Schmezer P, Zelezny O, Lopez Perez R, Kulozik AE, Debus J, Ehemann V (2012). Suberoylanilide hydroxamic acid affects gammaH2AX expression in osteosarcoma, atypical teratoid rhabdoid tumor and normal tissue cell lines after irradiation *Strahlentherapie und Onkologie : Organ der Deutschen Rontgengesellschaft [et al]* **188**, 168-176.
- [111] Chen X, Wong P, Radany EH, Stark JM, Laulier C, Wong JY (2012). Suberoylanilide hydroxamic acid as a radiosensitizer through modulation of RAD51 protein and inhibition of homology-directed repair in multiple myeloma *Molecular cancer research : MCR* **10**, 1052-1064.
- [112] Chiu HW, Yeh YL, Wang YC, Huang WJ, Chen YA, Chiou YS, Ho SY, Lin P, Wang YJ (2013). Suberoylanilide hydroxamic acid, an inhibitor of histone deacetylase, enhances radiosensitivity and suppresses lung metastasis in breast cancer *in vitro* and *in vivo* *PloS one* **8**, e76340.
- [113] Deorukhkar A, Shentu S, Park HC, Diagaradjane P, Puduvalli V, Aggarwal B, Guha S, Krishnan S (2010). Inhibition of radiation-induced DNA repair and prosurvival pathways contributes to vorinostat-mediated radiosensitization of pancreatic cancer cells *Pancreas* **39**, 1277-1283.
- [114] Flatmark K, Nome RV, Folkvord S, Bratland A, Rasmussen H, Ellefsen MS, Fodstad O, Ree AH (2006). Radiosensitization of colorectal carcinoma cell lines by histone deacetylase inhibition *Radiation oncology* **1**, 25.
- [115] Folkvord S, Ree AH, Furre T, Halvorsen T, Flatmark K (2009). Radiosensitization by SAHA in experimental colorectal carcinoma models-*in vivo* effects and relevance of histone acetylation status *International journal of radiation oncology, biology, physics* **74**, 546-552.
- [116] Lin SH, Zhang J, Giri U, Stephan C, Sobieski M, Zhong L, Mason KA, Molkenline J, Thames HD, Yoo SS, et al. (2014). A high content clonogenic survival drug screen identifies mek inhibitors as potent radiation sensitizers for KRAS mutant non-small-cell lung cancer *Journal of thoracic oncology : official publication of the International Association for the Study of Lung Cancer* **9**, 965-973.
- [117] Mueller S, Yang X, Sottero TL, Gragg A, Prasad GB, Polley M-Y, Weiss WA, Matthay KK, Davidoff AM, DuBois SG, et al. (2011). Cooperation of the HDAC inhibitor vorinostat and radiation in metastatic neuroblastoma: Efficacy and underlying mechanisms *Cancer letters* **306**, 223-229.
- [118] Munshi A, Tanaka T, Hobbs ML, Tucker SL, Richon VM, Meyn RE (2006). Vorinostat, a histone deacetylase inhibitor, enhances the response of human tumor cells to ionizing radiation through prolongation of gamma-H2AX foci *Molecular cancer therapeutics* **5**, 1967-1974.
- [119] Oertel S, Thiemann M, Richter K, Weber KJ, Huber PE, Perez RL, Brons S, Bischof M, Kulozik AE, Ehemann V, et al. (2011). Combination of suberoylanilide hydroxamic acid with heavy ion therapy shows promising effects in infantile sarcoma cell lines *Radiation oncology* **6**, 119.



- [120] Park MA, Mitchell C, Zhang G, Yacoub A, Allegood J, Haussinger D, Reinehr R, Larner A, Spiegel S, Fisher PB, et al. (2010). Vorinostat and sorafenib increase CD95 activation in gastrointestinal tumor cells through a Ca(2+)-de novo ceramide-PP2A-reactive oxygen species-dependent signaling pathway *Cancer research* **70**, 6313-6324.
- [121] Saelen MG, Ree AH, Kristian A, Fleten KG, Furre T, Hektoen HH, Flatmark K (2012). Radiosensitization by the histone deacetylase inhibitor vorinostat under hypoxia and with capecitabine in experimental colorectal carcinoma *Radiation oncology* **7**, 165.
- [122] Seo SK, Jin HO, Woo SH, Kim YS, An S, Lee JH, Hong SI, Lee KH, Choe TB, Park IC (2011). Histone deacetylase inhibitors sensitize human non-small cell lung cancer cells to ionizing radiation through acetyl p53-mediated c-myc down-regulation *Journal of thoracic oncology : official publication of the International Association for the Study of Lung Cancer* **6**, 1313-1319.
- [123] Singh S, Le H, Shih SJ, Ho B, Vaughan AT (2010). Suberoylanilide hydroxyamic acid modification of chromatin architecture affects DNA break formation and repair *International journal of radiation oncology, biology, physics* **76**, 566-573.
- [124] Sonnemann J, Kumar KS, Heesch S, Muller C, Hartwig C, Maass M, Bader P, Beck JF (2006). Histone deacetylase inhibitors induce cell death and enhance the susceptibility to ionizing radiation, etoposide, and TRAIL in medulloblastoma cells *International journal of oncology* **28**, 755-766.
- [125] Thiemann M, Oertel S, Ehemann V, Weichert W, Stenzinger A, Bischof M, Weber KJ, Perez RL, Haberkorn U, Kulozik AE, et al. (2012). *In vivo* efficacy of the histone deacetylase inhibitor suberoylanilide hydroxamic acid in combination with radiotherapy in a malignant rhabdoid tumor mouse model *Radiation oncology* **7**, 52.
